# Supplementary material
Source: Elsevier journal article supplement (http://library.osu.edu/sites/msa/suppmat/v236.i1.pp42-51/mmc8.pdf)
Supplement: mmc8 [file mmc8.pdf]

# $^{50}\text{Ti}^{35}\text{Cl}$ Assigned Transitions

Transitions are labeled using four columns, the excited state J value ( $J'$ ), the ground state J value ( $J''$ ), the observed transition wavenumber (Observed) and the fit residual multiplied by  $10^3$  (O-C).

${}^4\Gamma_{5/2} - X^4\Phi_{3/2} (0,0)$ 

| J'   | J''  | Observed   | O-C  | J'   | J''  | Observed   | O-C  |
|------|------|------------|------|------|------|------------|------|
| 7.5  | 6.5  | 23846.5707 | 3.3  | 12.5 | 13.5 | 23839.9417 | -0.1 |
| 8.5  | 7.5  | 23846.8975 | 5.5  | 13.5 | 14.5 | 23839.6322 | -3.4 |
| 9.5  | 8.5  | 23847.2211 | 3.7  | 14.5 | 15.5 | 23839.3293 | -1.0 |
| 10.5 | 9.5  | 23847.5473 | 3.7  | 15.5 | 16.5 | 23839.0301 | 4.2  |
| 11.5 | 10.5 | 23847.8747 | 4.1  | 16.5 | 17.5 | 23838.7261 | 3.8  |
| 12.5 | 11.5 | 23848.2009 | 2.5  | 17.5 | 18.5 | 23838.4253 | 5.6  |
| 13.5 | 12.5 | 23848.5294 | 2.4  | 18.5 | 19.5 | 23838.1177 | -0.3 |
| 14.5 | 13.5 | 23848.8601 | 3.6  | 19.5 | 20.5 | 23837.8197 | 2.6  |
| 15.5 | 14.5 | 23849.1868 | 0.1  | 20.5 | 21.5 | 23837.5172 | -0.1 |
| 16.5 | 15.5 | 23849.5177 | -0.1 | 21.5 | 22.5 | 23837.2150 | -3.3 |
| 17.5 | 16.5 | 23849.8497 | 0.1  | 22.5 | 23.5 | 23836.9183 | -1.9 |
| 18.5 | 17.5 | 23850.1813 | -1.0 | 23.5 | 24.5 | 23836.6250 | 1.9  |
| 19.5 | 18.5 | 23850.5122 | -3.6 | 24.5 | 25.5 | 23836.3254 | -1.5 |
| 20.5 | 19.5 | 23850.8490 | -1.0 | 25.5 | 26.5 | 23836.0248 | -6.9 |
| 21.5 | 20.5 | 23851.1797 | -5.5 | 26.5 | 27.5 | 23835.7370 | -0.4 |
| 22.5 | 21.5 | 23851.5188 | -2.3 | 27.5 | 28.5 | 23835.4414 | -2.7 |
| 26.5 | 25.5 | 23852.8811 | 8.2  | 28.5 | 29.5 | 23835.1476 | -4.1 |
| 27.5 | 26.5 | 23853.2167 | 3.8  | 29.5 | 30.5 | 23834.8702 | 9.8  |
| 28.5 | 27.5 | 23853.5474 | -6.4 |      |      |            |      |
